# Supplementary material
Source: publisher figshare collection journal article supplement (https://future-science-group.figshare.com/ndownloader/files/34891938)

Figure S2

(A) Neutrophil-lymphocyte ratio (PFS)


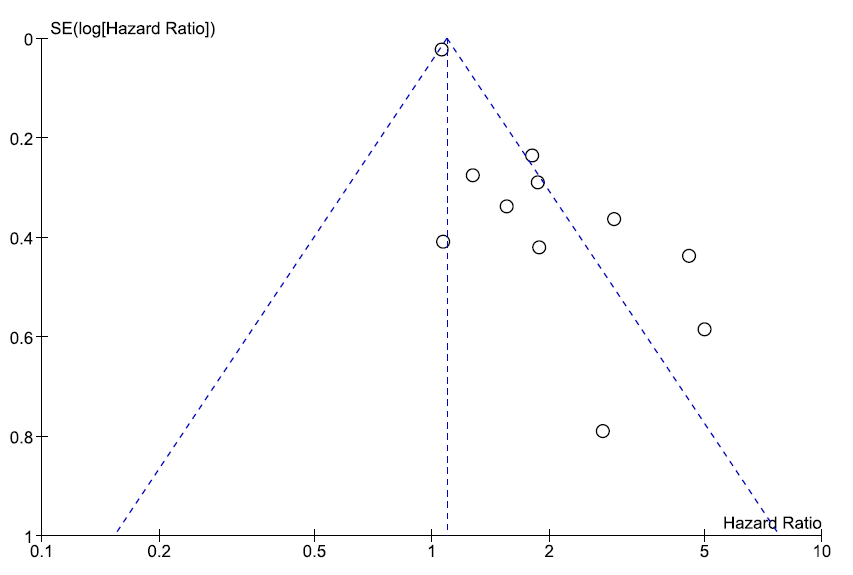


(B) Neutrophil-lymphocyte ratio (OS)


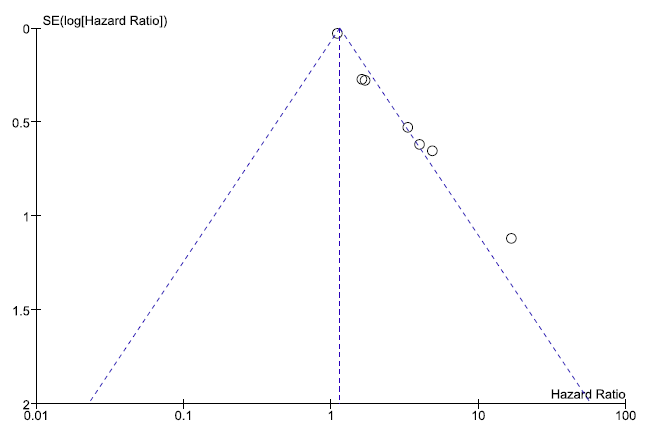


(C) Platelet-lymphocyte ratio (PFS)


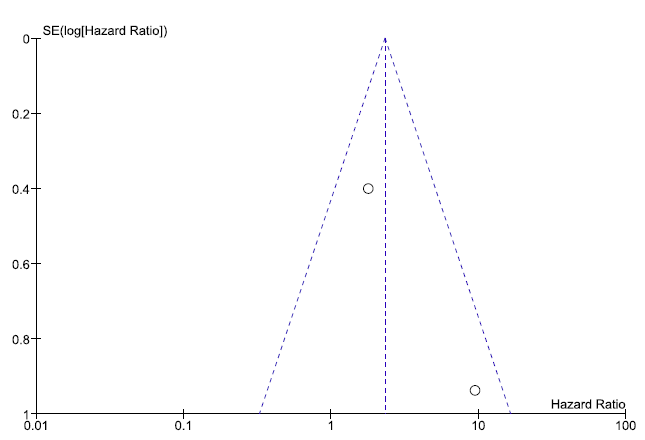


(D) Platelet-lymphocyte ratio (OS)


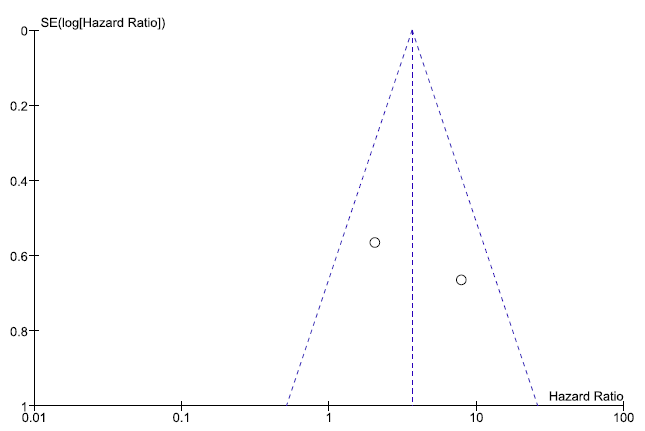


(E) C-reactive protein (PFS)


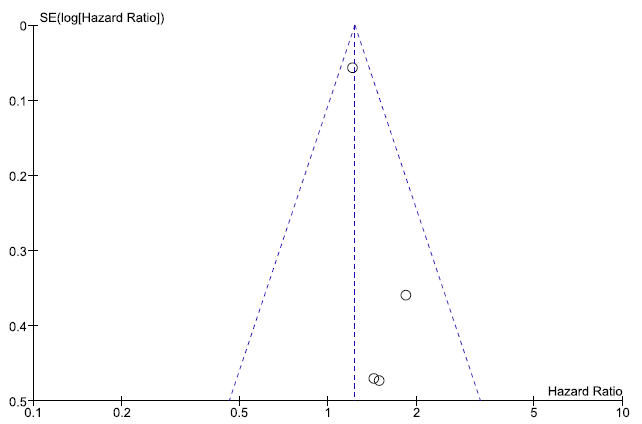


(F) C-reactive protein (OS)


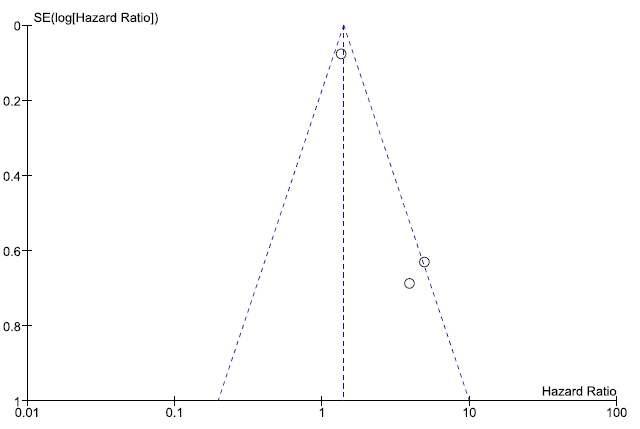


(G) Lactate dehydrogenase (PFS)


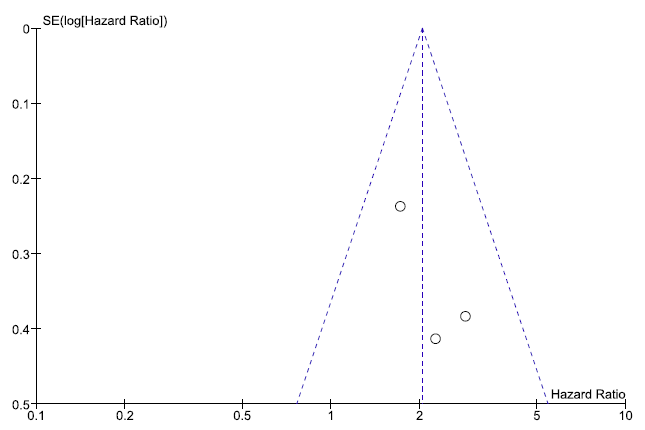

Supplement: Supplementary file 1 [file 34891938]
